# Supplementary material for: Systematic synthesis of pectin-g-(sodium acrylate-co-N-isopropylacrylamide) interpenetrating polymer network for superadsorption of dyes/M(ii): determination of physicochemical changes in loaded hydrogels
Source: Royal Society of Chemistry journal article supplement (doi:10.1039/c7py00316a), 2017-01-01
Supplement: c7py00316a1.pdf [file c7py00316a1.pdf]

### Supplementary information

for

## **Systematic Synthesis of Pectin-*g*-(Sodium Acrylate-co-N-Isopropylacrylamide) Interpenetrating Polymer Network for Mere/Synergistic Superadsorption of Dyes/M(II): Comprehensive Determination of Physicochemical Changes in Loaded Hydrogels**

Nayan Ranjan Singha,<sup>\*,a</sup> Mrinmoy Karmakar,<sup>a</sup> Manas Mahapatra,<sup>a</sup> Himarati Mondal,<sup>a</sup> Arnab Dutta,<sup>a</sup> Chandan Roy<sup>a</sup> and Pijush Kanti Chattopadhyay<sup>b</sup>

<sup>a</sup>Advanced Polymer Laboratory, Department of Polymer Science and Technology, Government College of Engineering and Leather Technology (Post-Graduate), Maulana Abul Kalam Azad University of Technology, Salt Lake, Kolkata - 700106, West Bengal, India.

<sup>b</sup>Department of Leather Technology, Government College of Engineering and Leather Technology (Post-Graduate), Maulana Abul Kalam Azad University of Technology, Salt Lake, Kolkata - 700106, West Bengal, India.

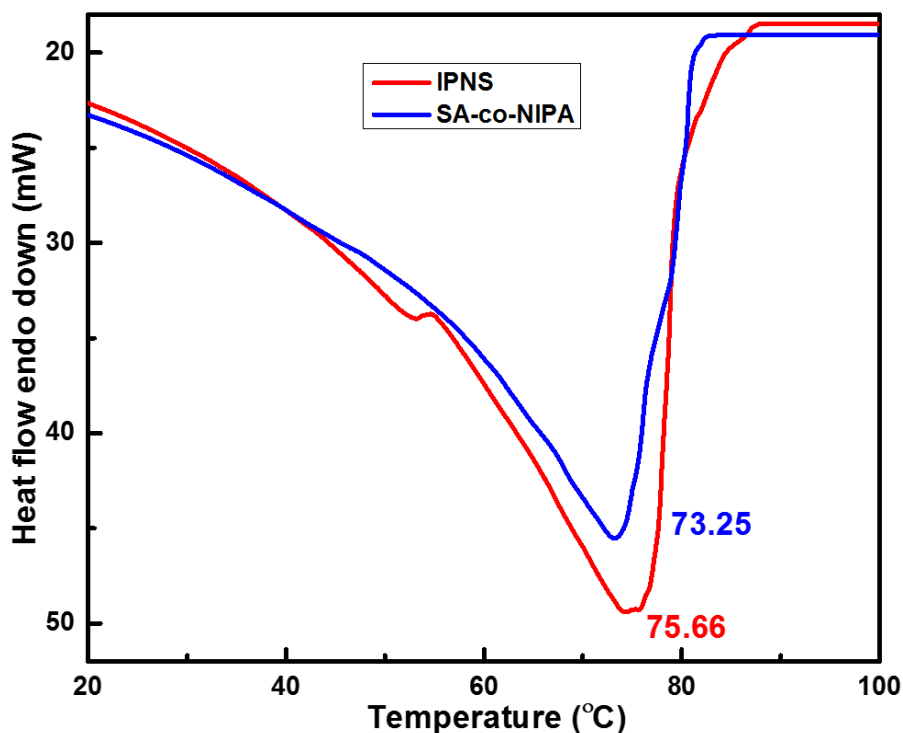

**Figure S1.** LCST of SA-co-NIPA and IPNS hydrogels

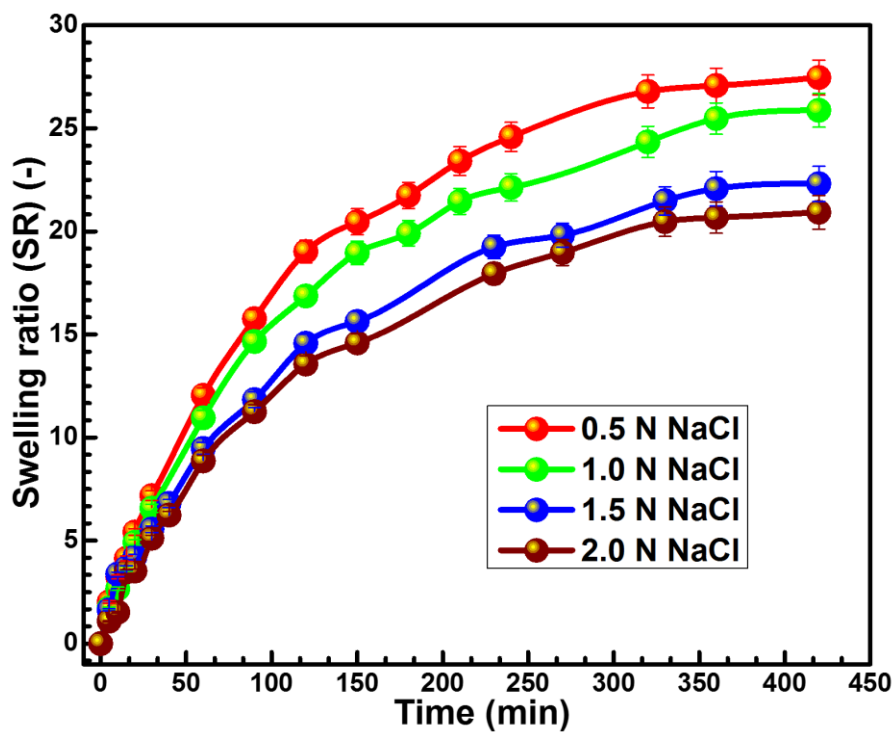

Fig. S2 ESR of IPNS in various ionic strengths of solutions

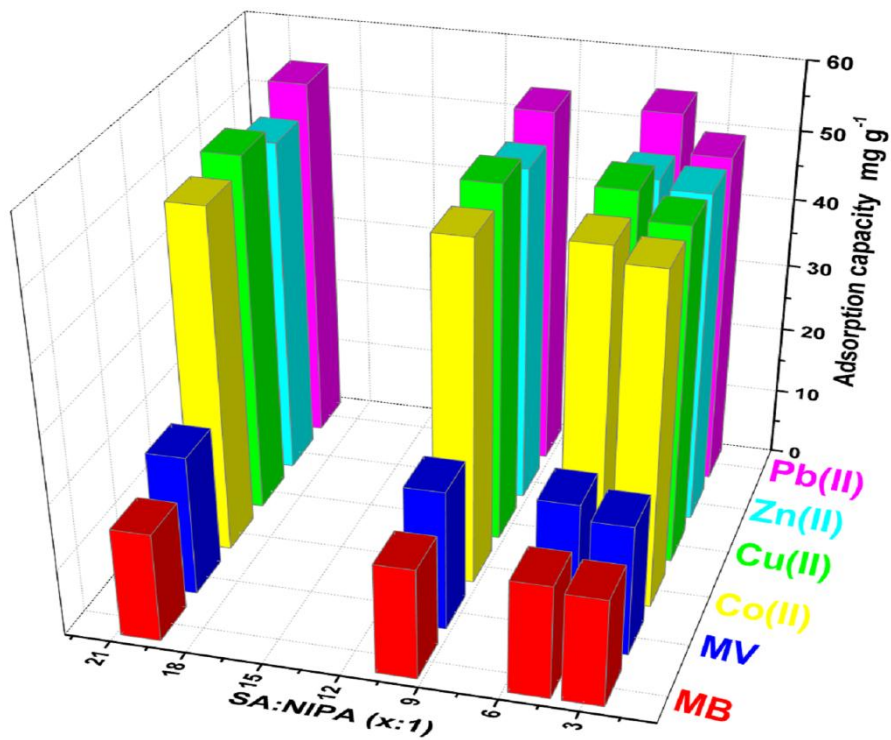

Fig. S3 Variation of ACs, of dyes and M(II), with different IPNs

## Comparison of the results obtained from literature

Several adsorbents, including natural, semi-synthetic, synthetic and waste materials have already been attempted for adsorptive waste remediation of MB, MV, Co(II), Cu(II), Zn(II) and Pb(II) at varying feed concentrations (2–1000 ppm), temperature (278–323 K) and pH (7.0–11.0 and 1.0–7.0 for dyes and M(II), respectively). However, ACs obtained in the present study were relatively higher than most of the reported results in literature (Table S1).

**Table S1.** Comparison table

| Dyes/M(II)                  | Name of the adsorbents                                                     | Adsorption capacities (mg g <sup>-1</sup> ) /pH/C <sub>0</sub> (mg L <sup>-1</sup> )/temperature (K) | Ref.            |
|-----------------------------|----------------------------------------------------------------------------|------------------------------------------------------------------------------------------------------|-----------------|
| MV                          | h-XG/SiO <sub>2</sub> <sup>a</sup>                                         | 378.80/9.0/350/313                                                                                   | S1              |
|                             | N-benzyltriazole derivatized dextran                                       | 95.24/4.0/12.5–50/288                                                                                | S2              |
|                             | MSWI bottom ash <sup>b</sup>                                               | 19.58/8.0/24.4/303                                                                                   | S3              |
|                             | AS <sup>c</sup>                                                            | 76.34/8.0/100–1000/278                                                                               | S4              |
|                             | Semi-IPN of starch and copolymer of AM <sup>d</sup> and HEMA <sup>e</sup>  | 2.47/7.0/2.5/303                                                                                     | S5              |
|                             | Soya ash                                                                   | 5.76/9.0/25/303                                                                                      | S6              |
|                             | CPSA4 <sup>f</sup>                                                         | 2.09/7.0/2/298                                                                                       | S7              |
|                             | poly(AM-co-AA) <sup>g</sup>                                                | 6.38/7.0/50/298                                                                                      | S8              |
|                             | Poly(VP-co-MA) <sup>h</sup>                                                | 4.22/7.0/500/298                                                                                     | S9              |
|                             | IPNS <sup>i</sup>                                                          | 265.49/10.0/200–300/303                                                                              | PS <sup>^</sup> |
|                             | IPNS <sup>j</sup>                                                          | 21.68/10.0/5–30/303                                                                                  | PS <sup>^</sup> |
| MB                          | h-XG/SiO <sub>2</sub> <sup>a</sup>                                         | 497.50/8.0/400/323                                                                                   | S1              |
|                             | Br/Mo heterostructures                                                     | 54.82/4.0/30–70/–                                                                                    | S10             |
|                             | MIL-53(A1)-NH <sub>2</sub> <sup>j</sup>                                    | 45.20/7.0/5/–                                                                                        | S11             |
|                             | MCGO <sup>k</sup>                                                          | 70.03/1.5–12.0/70/298                                                                                | S12             |
|                             | PNIPAAm <sup>l</sup>                                                       | 8.50/6.5–6.7/10–50/298                                                                               | S13             |
|                             | PNIPAAm/IA <sup>m</sup>                                                    | 17.52/6.5–6.7/10–50/298                                                                              | S13             |
|                             | PNIPAAm/IA/pumice                                                          | 22.18/6.5–6.7/10–50/298                                                                              | S13             |
|                             | BC-PM <sup>n</sup> microparticles                                          | 25/6.5/500/298                                                                                       | S14             |
|                             | Cu-BTC <sup>o</sup>                                                        | 15.28 <sup>*</sup> /7.0/1–10 <sup>†</sup> /298                                                       | S15             |
|                             | IPNS <sup>i</sup>                                                          | 137.43/11.0/200–300/303                                                                              | PS <sup>^</sup> |
|                             | IPNS <sup>j</sup>                                                          | 16.97/11.0/5–30/303                                                                                  | PS <sup>^</sup> |
| Co(II)                      | NiO                                                                        | 10.38/8.5/5–50/303                                                                                   | S16             |
|                             | Phosphate-immobilized Zr-pillared bentonite                                | 47.81/6.0/5/–                                                                                        | S17             |
|                             | PoP400 <sup>p</sup>                                                        | 373/6.0/10–1000/298                                                                                  | S18             |
|                             | PoP600 <sup>q</sup>                                                        | 405/6.0/10–1000/298                                                                                  | S18             |
|                             | IPNS <sup>i</sup>                                                          | 51.72/7.0/5–30/303                                                                                   | PS <sup>^</sup> |
| Cu(II)                      | P(NIPAM-MA-VI) <sup>r</sup>                                                | 21.10/5.0/–/333                                                                                      | S19             |
|                             | Bare Malachite Nanoparticle                                                | 3.20/5.0–6.0/10–100/–                                                                                | S20             |
|                             | Lemon peel                                                                 | 70.92/5.0/100–300/301                                                                                | S21             |
|                             | Cu(II)-imprinted poly(methacrylic acid/vinyl pyridine) polymer             | 22.40/7.0/2.5–70/298                                                                                 | S22             |
|                             | Fe <sub>3</sub> O <sub>4</sub> @SiO <sub>2</sub> -Cu(II)-imprinted polymer | 24.20/7.0/80/298                                                                                     | S23             |
|                             | Cu(II)-imprinted poly(chitosan/attapulgitite)                              | 35.20/1.0–6.0/40/298                                                                                 | S24             |
|                             | Cu(II) ion-imprinted poly(methacrylic acid/vinyl pyridine) micro-particles | 15.04/6.2/10/–                                                                                       | S25             |
|                             | Copper-imprinted polymethacrylate porous beads                             | 2.00/6.5/5–100/298                                                                                   | S26             |
|                             | IPNS <sup>i</sup>                                                          | 53.86/7.0/5–30/303                                                                                   | PS <sup>^</sup> |
|                             | Zn(II)                                                                     | Serbian natural clinoptilolite                                                                       | 12.00/–/600/298 |
| Composite E20 bentonite     |                                                                            | 29.67/5.0/10–750/293                                                                                 | S28             |
| Bare Malachite Nanoparticle |                                                                            | 3.30/5.0–6.0/10–100/–                                                                                | S20             |
| Bagasse Fly Ash             |                                                                            | 7.03/6.0/10–100/303                                                                                  | S29             |
| Lemon peel                  |                                                                            | 27.86/5.0/100–300/301                                                                                | S21             |
| IPNS <sup>i</sup>           |                                                                            | 50.46/7.0/5–30/303                                                                                   | PS <sup>^</sup> |
| Pb(II)                      | APAN <sup>s</sup>                                                          | 60.6/4.0/40–1000/303                                                                                 | S30             |
|                             | Bare Malachite Nanoparticle                                                | 7.2/5.0–6.0/10–100/–                                                                                 | S20             |
|                             | Lemon peel                                                                 | 37.87/5.0/100–300/301                                                                                | S21             |
|                             | Jordanian kaolinite                                                        | 13.32/5.0/50–400/295                                                                                 | S31             |
|                             | Kaolinite                                                                  | 11.50/5.7/10–50/303                                                                                  | S32             |
|                             | Montmorillonite                                                            | 31.10/5.7/10–50/303                                                                                  | S32             |
|                             | IPNS <sup>i</sup>                                                          | 54.86/7.0/5–30/303                                                                                   | PS <sup>^</sup> |

<sup>a</sup>Hydrolyzed polyacrylamide grafted xanthan gum and its nanosilica composite, <sup>b</sup>municipal solid waste incinerator, <sup>c</sup>almond shell, <sup>d</sup>acrylamide, <sup>e</sup>hydroxyethyl methacrylate, <sup>f</sup>IPN of poly(acrylic acid-co-acrylamide) and sodium alginate, <sup>g</sup>poly(acrylic acid-co-acrylamide), <sup>h</sup>poly(N-vinylpyrrolidone-co-methacrylic acid), <sup>i</sup>metal-organic framework, <sup>j</sup>interpenetrating network superadsorbent, <sup>k</sup>magnetic cellulose/graphene oxide composite, <sup>l</sup>poly(N-isopropylacrylamide) hydrogel, <sup>m</sup>poly(N-isopropylacrylamide)/itaconic acid composite hydrogel, <sup>n</sup>biochar microparticles derived from pig manure, <sup>o</sup>metal-organic framework (MOF) based on copper-benzenetricarboxylate,

<sup>p</sup>activated carbons produced by pyrolysis of waste potato peels at 400 °C, <sup>q</sup>activated carbons produced by pyrolysis of waste potato peels activated at 600 °C, <sup>r</sup>poly(N-isopropylacrylamide-co-maleic acid-co-1-vinylimidazole), <sup>s</sup>aminated polyacrylonitrile, <sup>#</sup>μ mol L<sup>-1</sup>, <sup>\*</sup>μ mol g<sup>-1</sup> and <sup>^</sup>present study.

## References

- S1 S. Ghorai, A. Sarkar, M. Raoufi, A. B. Panda, H. Schönherr and S. Pal, *ACS Appl. Mater. Interfaces*, 2014, **6**, 4766–4777.
- S2 E. Cho, M. N. Tahir, H. Kim, J. H. Yu and S. Jung, *RSC Adv.*, 2015, **5**, 34327–34334.
- S3 V. K. Gupta, I. Ali, V. K. Saini, T. V. Gerven, B. Van der Bruggen and C. Vandecasteele, *Ind. Eng. Chem. Res.*, 2005, **44**, 3655–3664.
- S4 C. Duran, D. Ozdes, A. Gundogdu and H. B. Senturk, *J. Chem. Eng. Data*, 2011, **56**, 2136–2147.
- S5 R. Bhattacharyya and S. K. Ray, *J. Ind. Eng. Chem.*, 2014, **20**, 3714–3725.
- S6 V. K. Gupta, A. Mittal, V. Gajbe and J. Mittal, *J. Colloid Interf. Sci.*, 2008, **319**, 30–39.
- S7 R. Bhattacharyya and S. K. Ray, *J. Ind. Eng. Chem.*, 2015, **22**, 92–102.
- S8 D. Solpan, S. Duran, D. Saraydin and O. Guven, *Radiat. Phys. Chem.*, 2003, **66**, 117–127.
- S9 D. S. Şolpan and Z. K. Kölge, *Radiat. Phys. Chem.*, 2006, **75**, 120–128.
- S10 D. Wang, H. Shen, L. Guo, C. Wang and F. Fu, *ACS Omega*, 2016, **1**, 566–577.
- S11 C. Li, Z. Xiong, J. Zhang and C. Wu, *J. Chem. Eng. Data*, 2015, **60**, 3414–3422.
- S12 H. Shi, W. Li, L. Zhong and C. Xu, *Ind. Eng. Chem. Res.*, 2014, **53**, 1108–1118.
- S13 B. Taşdelen, D. I. Çifçi and S. Meriç, *Colloid Surface A*, 2016, DOI: 10.1016/j.colsurfa.2016.11.003.
- S14 L. Lonappan, T. Rouissi, R. K. Das, S. K. Brar, A. A. Ramirez, M. Verma, R. Y. Surampalli and J. R. Valero, *Waste Manage.*, 2016, **49**, 537–544.
- S15 S. Lin, Z. Song, G. Che, A. Ren, P. Li, C. Liu and J. Zhang, *Micropor. Mesopor. Mater.*, 2014, **193**, 27–34.
- S16 A. Naeem, M. T. Saddique, S. Mustafa, S. Tasleem, K. H. Shah and M. Waseem, *J. Hazard Mater.*, 2009, **172**, 124–128.
- S17 T. S. Anirudhan, C. D. Bringle and P. G. Radhakrishnan, *Chem. Eng. J.*, 2012, **200–202**, 149–157.
- S18 G. Z. Kyzas, E. A. Deliyanni and K. A. Matis, *Colloid Surface A*, 2016, **490**, 74–83.
- S19 J. Cheng, G. Shan and P. Pan, *Ind. Eng. Chem. Res.*, 2017, DOI: 10.1021/acs.iecr.6b03626.
- S20 B. Saha, S. Chakraborty and G. Das, *J. Phys. Chem. C*, 2010, **114**, 9817–9825.
- S21 M. Thirumavalavan, Y. Lai, L. Lin and J. Lee, *J. Chem. Eng. Data*, 2010, **55**, 1186–1192.
- S22 Y. Jiang and D. Kim, *Chem. Eng. J.*, 2011, **116**, 435–444.
- S23 X. Luo, S. Luo, Y. Zhan, H. Shu, Y. Huang and X. Tu, *J. Hazard. Mater.*, 2011, **192**, 949–955.
- S24 Y. Shi, Q. Zhang, L. Feng, Q. Xiong and J. Chen, *Korean J. Chem. Eng.*, 2014, **31**, 821–827.
- S25 N. T. Hoai, D. K. Yoo and D. Kim, *J. Hazard. Mater.*, 2010, **173**, 462–467.
- S26 N. T. Hoai and D. Kim, *Aiche J.*, 2009, **55**, 3248–3254.
- S27 D. Stojakovic, J. Hrenovic, M. Mazaj and N. Rajic, *J. Hazard. Mater.*, 2011, **185**, 408–415.
- S28 A. Mockovciakova, Z. Orolinova and J. Skvarla, *J. Hazard. Mater.*, 2010, **180**, 274–281.
- S29 V. C. Srivastava, I. D. Mall and I. M. Mishra, *Ind. Eng. Chem. Res.*, 2008, **47**, 3129–3137.
- S30 P. Kampalanonwat and P. Supaphol, *ACS Appl. Mater. Interfaces*, 2010, **2**, 3619–3627.
- S31 M. Al-Harshsheh, R. Shawabkeh, A. Al-Harshsheh, K. Tarawneh and M. M. Batiha, *Appl. Surf. Sci.*, 2009, **255**, 8098–8103.
- S32 S. S. Gupta and K. G. Bhattacharyya, *J. Environ. Manag.*, 2008, **87**, 46–58.
